# Supplementary material for: Matrix metalloproteinase MMP9 maintains epithelial barrier function and preserves mucosal lining in colitis associated cancer
Source: PubMed Central journal article supplement (PMC5706902; doi:10.18632/oncotarget.21841), 2017-10-17
Supplement: oncotarget-08-94650-s001.pdf [file oncotarget-08-94650-s001.pdf]

# Matrix metalloproteinase MMP9 maintains epithelial barrier function and preserves mucosal lining in colitis associated cancer

## SUPPLEMENTARY MATERIALS

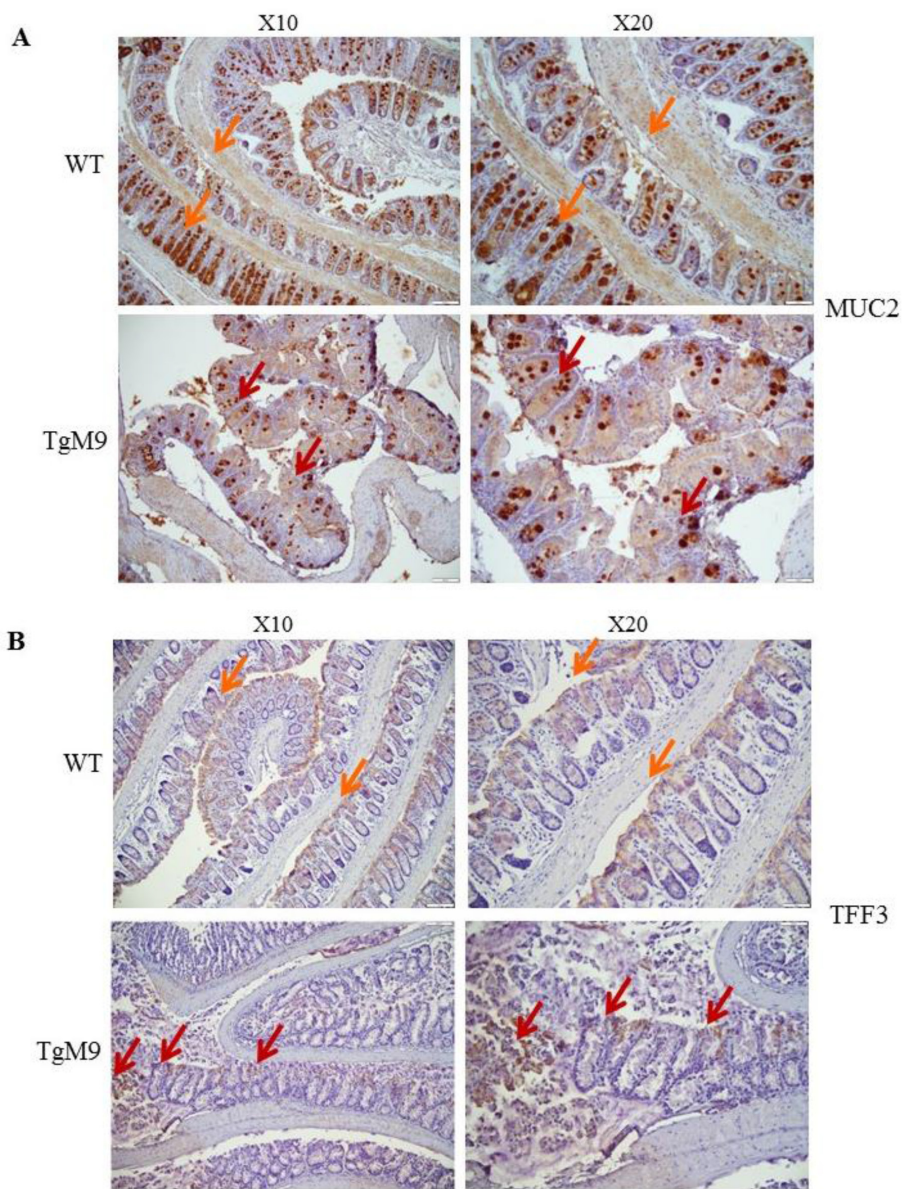

**Supplementary Figure 1: MUC2 and TFF3 expressions in TgM9 mice and WTs without CAC.** Immunostaining of the Swiss roll of the colons of TgM9 and WT mice (n=10 each group) with (A) anti-MUC2; (B) anti-TFF3. Red arrows indicate brown staining among TgM9 mice and orange arrows indicate brown staining among WT littermates exposed to water/ without CAC. Images are representative of two experiments.

**Supplementary Table 1: Sequences of the QPCR primers used in the study**

| Gene                  | Forward (5'-3')           | Reverse (5'-3')             |
|-----------------------|---------------------------|-----------------------------|
| <i>Firmicutes</i>     | GGCAGCAGTRGGGAATCTTC      | ACACYTAGYACTCATCGTT         |
| <i>Bacteroidetes</i>  | GGARCATGTGGTTTAATTCGATGAT | AGCTGACGACAACCATGCAG        |
| <i>A. Muciniphila</i> | CAGCACGTGAAGGTGGGGAC      | CCTTGCGGTTGGCTTCAGAT        |
| <i>Reg3-a</i>         | GGCACCGAGCCCAATG          | GGATTTCTCTCCCATGCAAAGT      |
| <i>Reg3-b</i>         | ATACCCTCCGCACGCATTAGTT    | AGG CCAGTTCTG CATCAAACCA    |
| <i>Reg3-g</i>         | TTCCTGTCCTCCATGATCAAAA    | CATCCACCTCTGTTGGGTTCA       |
| <i>S100A8</i>         | CATCCACCTCTGTTGGGTTCA     | CATCCACCTCTGTTGGGTTCA       |
| <i>IL-22</i>          | GTCAACCGCACCTTTATGCT      | GTTGAGCACCTGCTTCATCA        |
| <i>IL-6</i>           | ACAAGTCGGAGGCTTAATTACACAT | TTGCCATTGCACAACCTCTTTTC     |
| <i>IL-1β</i>          | TCGCTCAGGGTCACAAGAAA      | CATCAGAGGCAAGGAGGAAAAAC     |
| <i>TNF-α</i>          | AGGCTGCCCCGACTACGT        | GACTTTCTCCTGGTATGAGATAGCAAA |
| <i>IFN γ</i>          | CAGCAACAGCAAGGCGAAA       | CTGGACCTGTGGGTTGTTGAC       |
| <i>16s rRNA</i>       | AGAGTTTGATCCTGGCTCAG      | CTGCTGCCTCCCGTAGGAGT        |

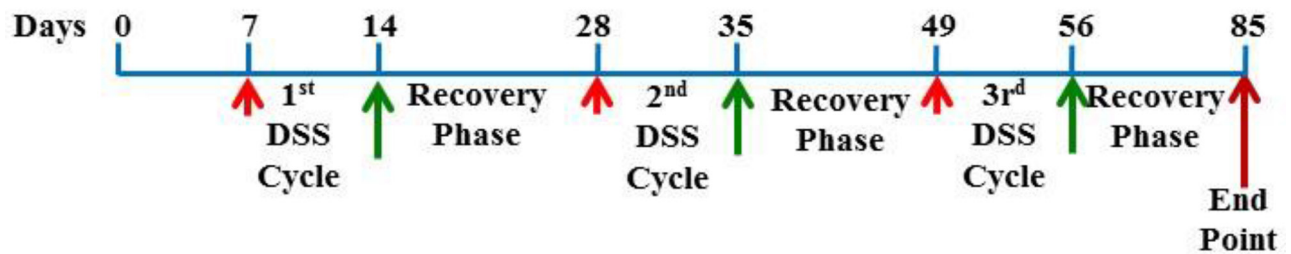

**Supplementary Figure 2: Schematic of CAC model used for the study.** CAC was induced by three cycles of DSS (1 week long). Each DSS cycle was followed by two weeks of recovery cycle. End point of the experiment was day 85. Red arrows represent the start point of DSS cycle and green arrows represent the start point of recovery cycle.
